# Supplementary material
Source: PubMed Central journal article supplement (PMC8802173)
Supplement: NIHMS1767596-supplement-Supple_fig_1.pdf [file NIHMS1767596-supplement-Supple_fig_1.pdf]

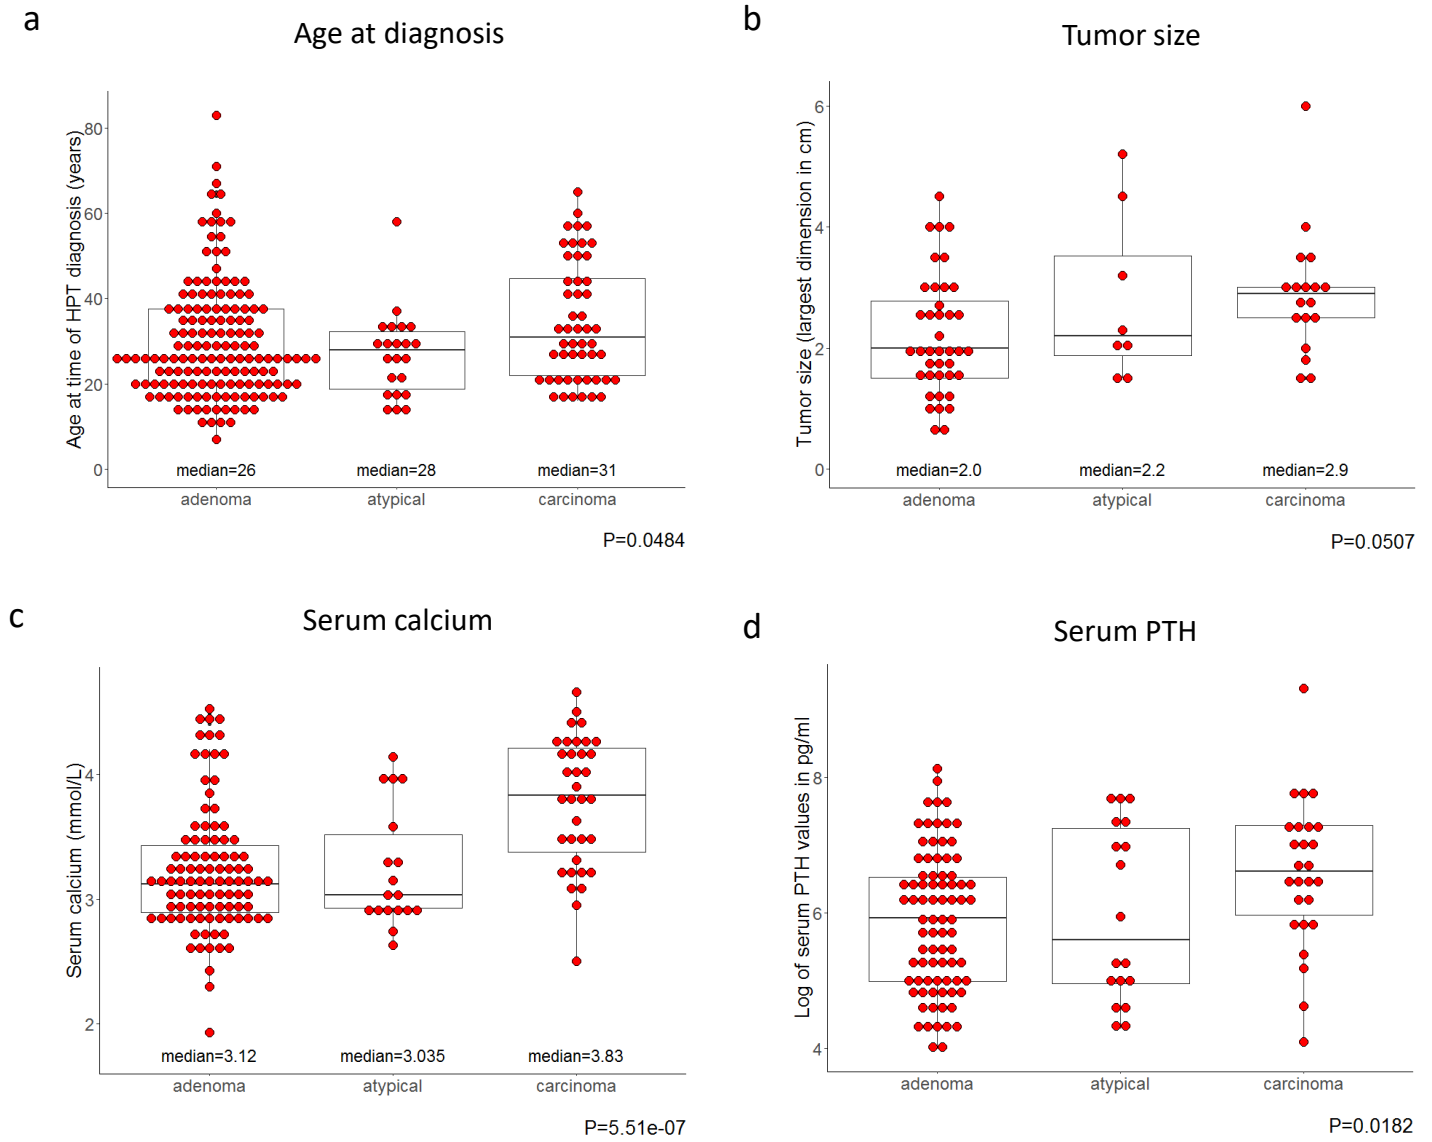

Supplementary Figure 1. Comparison of clinical features in the subjects with parathyroid classic adenomas, atypical parathyroid adenomas, or parathyroid carcinomas. The dot plots show difference between the marked groups on a) age at the diagnosis of hyperparathyroidism; b) parathyroid tumor size; c) serum calcium levels; and d) serum PTH levels.
