# Supplementary material
Source: PubMed Central journal article supplement (PMC8802173)
Supplement: NIHMS1767596-supplement-Supple_fig_2.pdf [file NIHMS1767596-supplement-Supple_fig_2.pdf]

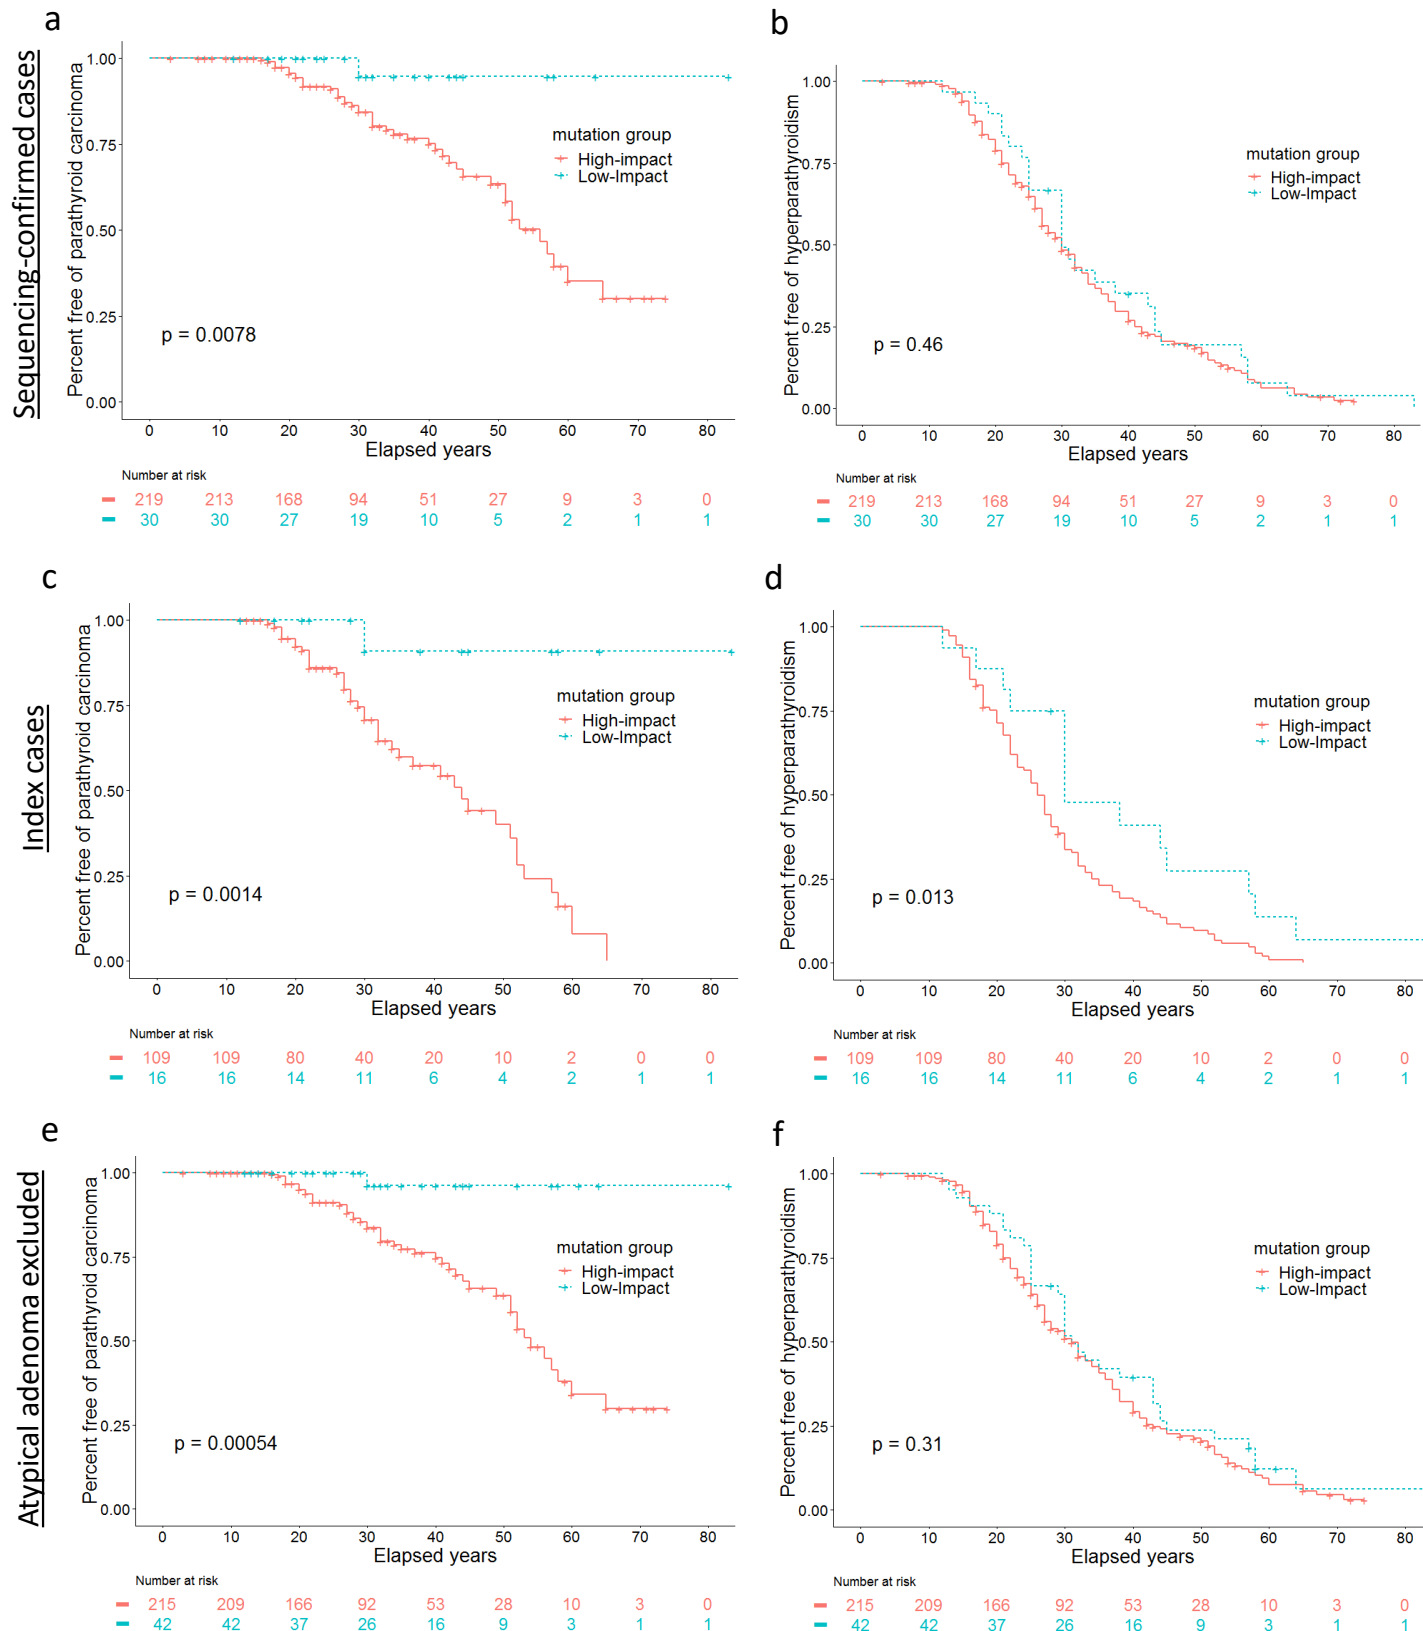

Supplementary Figure 2. Kaplan-Meier plots of event-free survival of parathyroid carcinoma (left) and hyperparathyroidism (right) in several subsets of the subjects grouped by high- or low-impact germline mutations of the *CDC73* gene: (a,b) Subjects with *CDC73* germline mutations that were confirmed by DNA sequencing; (c,d) subjects who were index cases; and (e,f) subjects after atypical parathyroid adenomas were excluded.
