# Supplementary material
Source: PubMed Central journal article supplement (PMC8802173)
Supplement: NIHMS1767596-supplement-Supple_fig_3.pdf [file NIHMS1767596-supplement-Supple_fig_3.pdf]

a

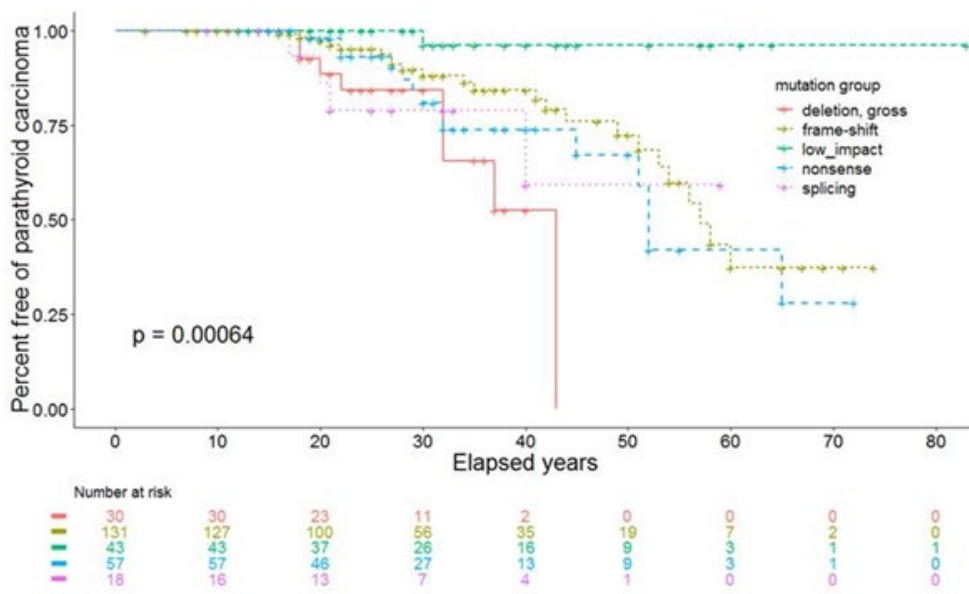

b

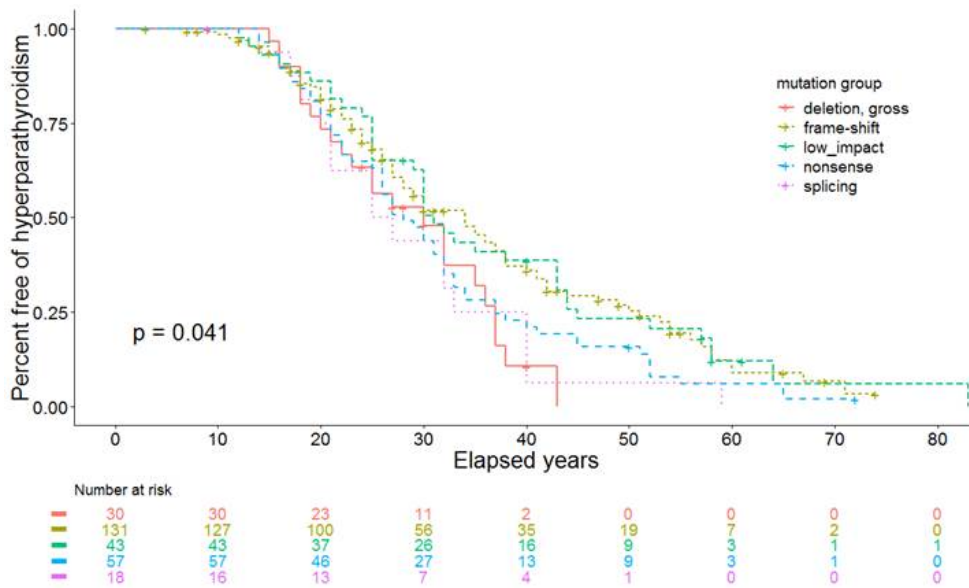

Supplementary Figure 3. Kaplan-Meier plots of event-free survival of parathyroid carcinoma (a) and hyperparathyroidism (b) in the subjects grouped by mutation types of high-impact mutations in comparison to the subjects with low-impact mutations.
