# Supplementary material
Source: PubMed Central journal article supplement (PMC8802173)
Supplement: NIHMS1767596-supplement-Supple_fig_5.pdf [file NIHMS1767596-supplement-Supple_fig_5.pdf]

**Sequencing-confirmed cases**

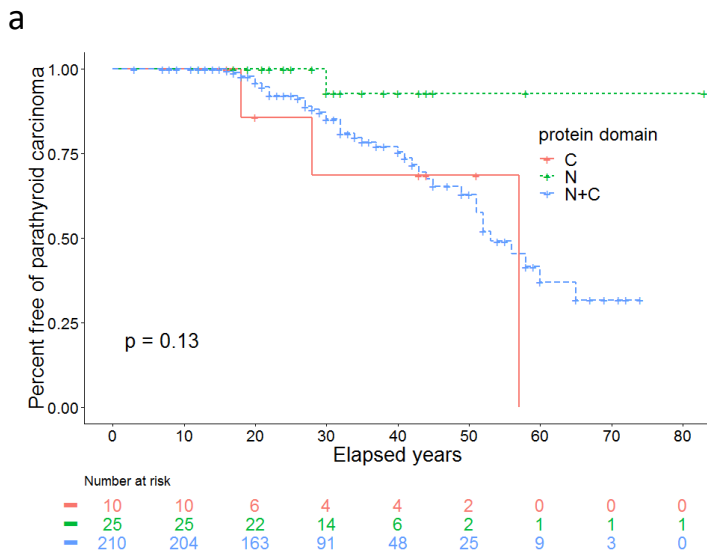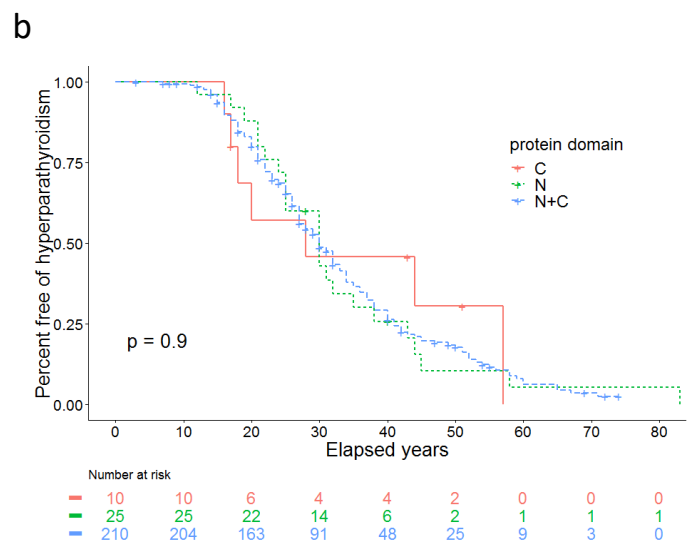

**Index cases**

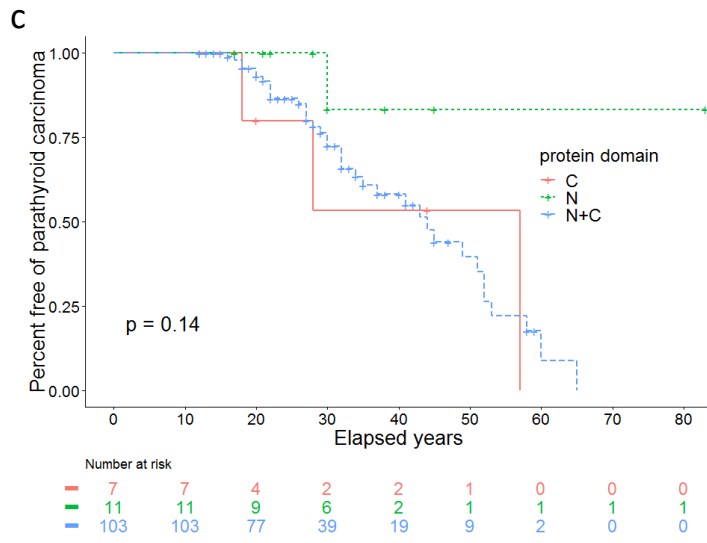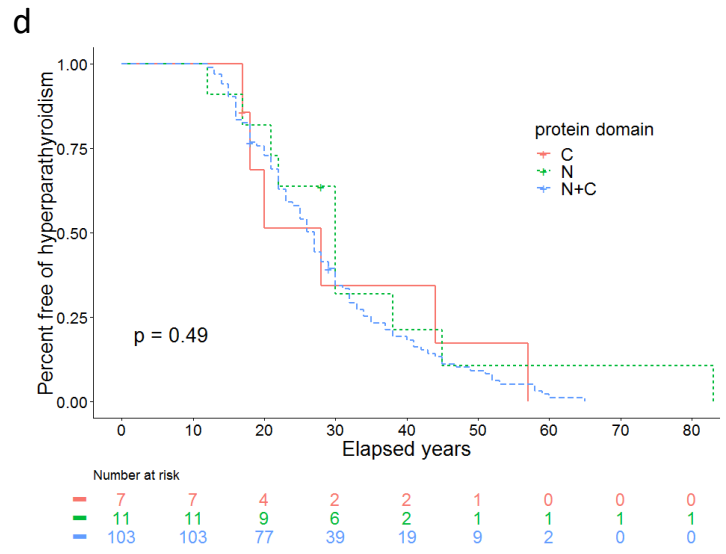

**Atypical adenoma excluded**

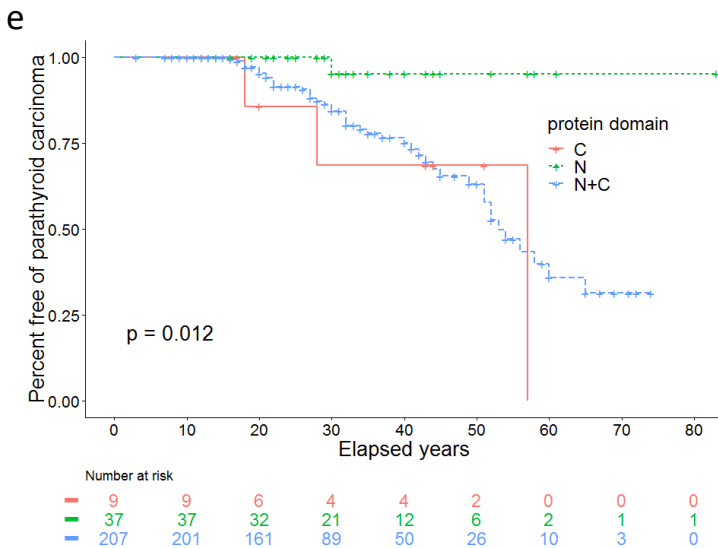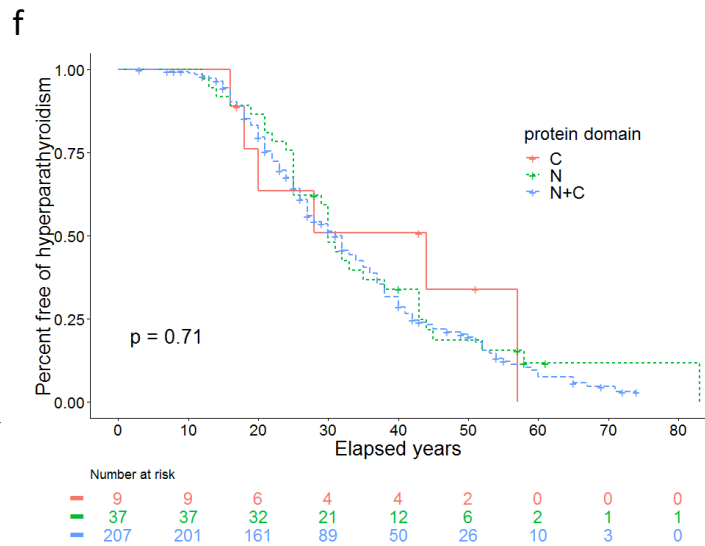

Supplementary Figure 5. Kaplan-Meier plots of event-free survival of parathyroid carcinoma (left) and hyperparathyroidism (right) in several subsets of the subjects grouped by the mutations affecting the NTD only (N), the CTD only (C) or both protein domains (N+C): (a,b) Subjects with sequencing-confirmed *CDC73* germline mutations; (c,d) subjects who were index cases; and (e,f) subjects after atypical parathyroid adenomas were excluded.
