# Supplementary material
Source: PubMed Central journal article supplement (PMC8802173)
Supplement: NIHMS1767596-supplement-Supple_table_1.pdf [file NIHMS1767596-supplement-Supple_table_1.pdf]

Supplementary Table 1. List of the published case reports/case series included in the present study.

| <i>CDC73</i> germline mutation | Published case reports/case series                                                 |
|--------------------------------|------------------------------------------------------------------------------------|
| *12C>A                         | Frank-Raue (2011) Eur J Endocrinol 165,477                                         |
| 41-bp insertion exon 1         | Carpten (2002) Nat Genet 32, 676                                                   |
| c.1124_1125dupTT               | Pimenta (2006) Oral Oncol 42, 735                                                  |
| c.1135G>A                      | Bradley (2006) Clin Endocrinol (Oxf) 64, 299                                       |
| c.1239delA                     | Carpten (2002) Nat Genet 32, 676<br>Bradley (2005) J Intern Med 257, 18            |
| c.127_128insC                  | Juhlin (2007) Endocr Relat Cancer 14, 501                                          |
| c.131+1G>A                     | Cetani (2004) J Clin Endocrinol Metab 89, 5583                                     |
| c.1346delG                     | Frank-Raue (2011) Eur J Endocrinol 165, 477                                        |
| c.1382delT                     | Chiofalo (2014) Cell Oncol (Dordr) 37, 281                                         |
| c.14_17dupTTAG                 | Khadilkar (2015) Endocr Pract 21, 1010                                             |
| c.140_144delAGGAA              | Masi (2008) Endocr Relat Cancer 15, 1115<br>Kelly (2006) J Bone Miner Res 21, 1666 |
| c.1432_1433delCT               | Frank-Raue (2011) Eur J Endocrinol 165, 477                                        |
| c.1475G>A                      | Siu (2011) Fam Cancer 10, 695                                                      |
| c.157G>T                       | Kong (2014) Clin Endocrinol (Oxf) 81, 222                                          |
| c.-16_8del24                   | Bellido (2016) Endocr Pathol, 27:142-146                                           |
| c.163T>A                       | Bricaire (2013) J Clin Endocrinol Metab 98, E403                                   |
| c.165C>A                       | Veiguela (2010) Endocrinol Nutr 57, 391                                            |
| c.165C>G                       | Carpten (2002) Nat Genet 32, 676<br>Bradley (2005) J Intern Med 257, 18            |
| c.176C>T                       | Haven (2007) Clin Endocrinol (Oxf) 67, 370                                         |
| c.188T>C                       | Masi (2008) Endocr Relat Cancer 15, 1115                                           |
| c.191T>C                       | Howell (2003) J Med Genet 40, 657                                                  |

|                        |                                                                                                                                |
|------------------------|--------------------------------------------------------------------------------------------------------------------------------|
|                        | Villablanca (2004) J Med Genet 41, e32                                                                                         |
| c.194dupA              | Takeuchi (2015) Clin Pediatr Endocrinol 24, 185                                                                                |
| c.20_24delTCCTGinsCCCT | Aldred (2006) Oral Surg Oral Med Oral Pathol Oral Radiol<br>Endod 101, 212                                                     |
| c.205dupC              | Pichardo-Lowden (2011) Endocr Pract 17, 602                                                                                    |
| c.226C>T               | Siu (2011) Fam Cancer 10, 695                                                                                                  |
| c.22delC               | Carlson (2008) Endocr Pract 14, 743                                                                                            |
| c.237+1G>C             | Bricaire (2013) J Clin Endocrinol Metab 98, E403<br>Villablanca (2004) J Med Genet 41, e32                                     |
| c.238-1G>A             | Moon (2005) J Clin Endocrinol Metab 90, 878                                                                                    |
| c.242_253del12         | Pazienza (2013) PLoS One 8, e82292                                                                                             |
| c.253_258delGTGGTT     | Pazienza (2013) PLoS One 8, e82292                                                                                             |
| c.25C>T                | Carpten (2002) Nat Genet 32, 676<br>Bradley (2005) J Intern Med 257, 18<br>Schmitdt (2009) J Oral Maxillofac Surg 67:423       |
| c.260_261delGA         | Wang (2012) PLoS One 7, e45567<br>Kong (2013) Zhonghua Yi Xue Za Zhi 93, 3364                                                  |
| c.271C>T               | Bricaire (2013) J Clin Endocrinol Metab 98, E403<br>Shibata (2015) endocrine journal 62(7)<br>Starker (2012) Horm Cancer 3, 44 |
| c.272G>C               | Cetani (2007) Endocr Relat Cancer 14, 493                                                                                      |
| c.293T>C               | Bricaire (2013) J Clin Endocrinol Metab 98, E403                                                                               |
| c. 306_307+13del       | Carpten (2002) Nat Genet 32, 676                                                                                               |
| c.307+1G>A             | Kong (2014) Clin Endocrinol (Oxf) 81, 222                                                                                      |
| c.307+5G>T             | Frank-Raue (2011) Eur J Endocrinol 165, 477                                                                                    |
| c.308-9T>A             | Bricaire (2013) J Clin Endocrinol Metab 98, E403                                                                               |
| c.30delIG              | Carpten (2002) Nat Genet 32, 676                                                                                               |

|                    |                                                                                                                                                                                      |
|--------------------|--------------------------------------------------------------------------------------------------------------------------------------------------------------------------------------|
| c.343G>T           | Cetani (2008) J Endocrinol Invest 31, 900                                                                                                                                            |
| c.35_41delACATCCA  | Carpten (2002) Nat Genet 32, 676                                                                                                                                                     |
| c.356delA          | Bradley (2005) J Intern Med 257, 18<br>Carpten (2002) Nat Genet 32, 676                                                                                                              |
| c.375dupA          | Shattuck (2003) N Engl J Med 349, 1722                                                                                                                                               |
| c.376C>T           | Bricaire (2013) J Clin Endocrinol Metab 98, E403                                                                                                                                     |
| c.3G>A             | Carpten (2002) Nat Genet 32, 676                                                                                                                                                     |
| c.406A>T           | Carpten (2002) Nat Genet 32, 676                                                                                                                                                     |
| c.40C>T            | Khadilkar (2015) Endocr Pract 21, 1010<br>Kong (2013) Zhonghua Yi Xue Za Zhi 93, 3364                                                                                                |
| c.40delC           | Carpten (2002) Nat Genet 32, 676<br>Bradley (2005) J Intern Med 257, 18<br>Mizusawa (2006) Clin Endocrinol (Oxf) 65, 9                                                               |
| c.415C>T           | Bricaire (2013) J Clin Endocrinol Metab 98, E403<br>Cetani (2007) Eur J Endocrinol 156, 547<br>Guarnieri (2012) Cell Oncol (Dordr) 35: 411<br>Khadilkar (2015) Endocr Pract 21, 1010 |
| c.424-5T>C         | Frank-Raue (2011) Eur J Endocrinol 165, 477                                                                                                                                          |
| c.433_442delinsAGA | Masi (2008) Endocr Relat Cancer 15, 1115                                                                                                                                             |
| c.481_484 delAAAG  | Bricaire (2013) J Clin Endocrinol Metab 98, E403                                                                                                                                     |
| c.505C>T           | Ghemigian (2013) Hormones (Athens) 12, 454                                                                                                                                           |
| c.520_523delTCTG   | Guarnieri (2012) Cell Oncol (Dordr) 35: 411<br>Mizusawa (2006) Clin Endocrinol (Oxf) 65, 9                                                                                           |
| c.571delG          | Kong (2013) Zhonghua Yi Xue Za Zhi 93, 3364                                                                                                                                          |
| c.62_66delAGGGA    | Mizusawa (2006) Clin Endocrinol (Oxf) 65, 9                                                                                                                                          |
| c.626_629delAACA   | Kong (2013) Zhonghua Yi Xue Za Zhi 93, 3364<br>Wang (2012) PLoS One 7, e45567                                                                                                        |

|                    |                                                                                                                                                                                                                                                                                                                 |
|--------------------|-----------------------------------------------------------------------------------------------------------------------------------------------------------------------------------------------------------------------------------------------------------------------------------------------------------------|
| c.639delT          | Carpten (2002) Nat Genet 32, 676                                                                                                                                                                                                                                                                                |
| c.664C>T           | Bricaire (2013) J Clin Endocrinol Metab 98, E403<br>Juhlin (2007) Endocr Relat Cancer 14, 501<br>Khadilkar (2015) Endocr Pract 21, 1010<br>Kong (2013) Zhonghua Yi Xue Za Zhi 93, 3364<br>Kong (2014) Clin Endocrinol (Oxf) 81, 222<br>Shattuck (2003) N Engl J Med 349, 1722<br>Wang (2012) PLoS One 7, e45567 |
| c.668_669delATinsG | Bradley (2005) J Intern Med 257, 18                                                                                                                                                                                                                                                                             |
| c.685_688delAGAG   | Bricaire (2013) J Clin Endocrinol Metab 98, E403<br>Guarnieri (2006) J Clin Endocrinol Metab 91, 2827<br>Guarnieri (2012) Cell Oncol (Dordr) 35: 411<br>Kong (2013) Zhonghua Yi Xue Za Zhi 93, 3364<br>Sarquis (2008) Surgery 143, 630                                                                          |
| c.687_688delAG     | Bricaire (2013) J Clin Endocrinol Metab 98, E403<br>Guarnieri (2012) Cell Oncol (Dordr) 35: 411<br>Howell (2003) J Med Genet 40, 657<br>Kong (2013) Zhonghua Yi Xue Za Zhi 93, 3364<br>Sarquis (2008) Surgery 143, 630<br>Wang (2012) PLoS One 7, e45567                                                        |
| c.687_688dupAG     | Carpten (2002) Nat Genet 32, 676<br>Bradley (2005) J Intern Med 257, 18<br>Shattuck (2003) N Engl J Med 349, 1722                                                                                                                                                                                               |
| c.692_693insT      | Haven (2007) Clin Endocrinol (Oxf) 67, 370                                                                                                                                                                                                                                                                      |
| c.700C>T           | Bradley (2006) clin Endocrinol (oxf) 64, 299<br>Bricaire (2013) J Clin Endocrinol Metab 98, E403<br>Cetani (2007) Eur J Endocrinol 156, 547                                                                                                                                                                     |

|                        |                                                                                                                                                     |
|------------------------|-----------------------------------------------------------------------------------------------------------------------------------------------------|
|                        | Frank-Raue (2011) Eur J Endocrinol 165, 477                                                                                                         |
| c.745dup1              | Bradley (2006) Clin Endocrinol (Oxf) 64, 299                                                                                                        |
| c.766-767delGT         | Cavaco (2004) J Clin Endocrinol Metab 89, 1747                                                                                                      |
| c.76delA               | Frank-Raue (2011) Eur J Endocrinol 165, 477<br>Howell (2003) J Med Genet 40, 657                                                                    |
| c.815A>G               | Juhlin (2006) Endocr Relat Cancer 13, 509                                                                                                           |
| c.85delG               | Rekik (2010) Ann Endocrinol (Paris) 71, 121                                                                                                         |
| c.85G>T                | Abdulla (2013) Endocr Pract 19: e134<br>Bricaire (2013) J Clin Endocrinol Metab 98, E403                                                            |
| c.96G>A                | Kong (2013) Zhonghua Yi Xue Za Zhi 93, 3364<br>Kutcher (2013) Head Neck 35:E175<br>Sarquis (2008) Surgery 143, 630                                  |
| deletion of exon 3     | Bricaire (2013) J Clin Endocrinol Metab 98, E403                                                                                                    |
| deletion of exons 1-10 | Korpi-Hyövälti (2014) J Clin Endocrinol Metab 99, 3044                                                                                              |
| deletion of exons 2-3  | Bricaire (2013) J Clin Endocrinol Metab 98, E403                                                                                                    |
| deletion of exons 4-6  | Bricaire (2013) J Clin Endocrinol Metab 98, E403<br>Kong (2014) Clin Endocrinol (Oxf) 81, 222                                                       |
| deletion of exons 7-13 | Bricaire (2013) J Clin Endocrinol Metab 98, E403                                                                                                    |
| deletion of the gene   | Bricaire (2013) J Clin Endocrinol Metab 98, E403<br>Cascón (2011) Genes Chromosomes Cancer 50, 922<br>Domingues (2012) Clin Endocrinol (Oxf) 76, 33 |
| g.95151T>C             | Bradley (2006) Clin Endocrinol (Oxf) 64, 299                                                                                                        |
