# Supplementary material
Source: PubMed Central journal article supplement (PMC8802173)
Supplement: NIHMS1767596-supplement-Supple_table_2.pdf [file NIHMS1767596-supplement-Supple_table_2.pdf]

Supplementary Table 2. Mutation type, genotype group and parathyroid phenotype of all subjects included in the present study.

| <i>CDC73</i> DNA mutations | Total No. of pts | No. of pts w/ parathyroid carcinoma | No. of pts w/ benign parathyroid lesion | No. of pts w/o parathyroid disease | Mutation type <sup>1</sup> | Major/ Minor Group <sup>2</sup> | Protein domain affected <sup>3</sup> |
|----------------------------|------------------|-------------------------------------|-----------------------------------------|------------------------------------|----------------------------|---------------------------------|--------------------------------------|
| c.-16_8del24               | 1                |                                     | 1                                       |                                    | deletion, gross            | High                            | N+C                                  |
| c.3G>A                     | 4                |                                     | 4                                       |                                    | deletion, gross            | High                            | N+C                                  |
| deletion of exon 3         | 1                |                                     | 1                                       |                                    | deletion, gross            | High                            | N+C                                  |
| deletion of exons 1-10     | 8                | 2                                   | 4                                       | 2                                  | deletion, gross            | High                            | N+C                                  |
| deletion of exons 2-3      | 1                |                                     | 1                                       |                                    | deletion, gross            | High                            | N+C                                  |
| deletion of exons 4-6      | 5                | 1                                   | 4                                       |                                    | deletion, gross            | High                            | N+C                                  |
| deletion of exons 7-13     | 1                |                                     | 1                                       |                                    | deletion, gross            | High                            | N+C                                  |
| deletion of the gene       | 15               | 6                                   | 4                                       | 5                                  | deletion, gross            | High                            | N+C                                  |
| c.1239delA                 | 4                |                                     | 3                                       | 1                                  | deletion, small            | High                            | C                                    |
| c.1242delA                 | 1                | 1                                   |                                         |                                    | deletion, small            | High                            | C                                    |
| c.1346delG                 | 5                | 1                                   | 1                                       | 3                                  | deletion, small            | High                            | C                                    |
| c.1382delT                 | 4                | 1                                   | 1                                       | 2                                  | deletion, small            | High                            | C                                    |
| c.140_144delAGGAA          | 12               | 2                                   | 5                                       | 5                                  | deletion, small            | High                            | N+C                                  |
| c.1432_1433delCT           | 1                |                                     | 1                                       |                                    | deletion, small            | High                            | C                                    |
| c.22delC                   | 1                |                                     | 1                                       |                                    | deletion, small            | High                            | N+C                                  |
| c.242_253del12             | 2                |                                     | 1                                       | 1                                  | deletion, small            | Low                             | N                                    |
| c.253_258delGTGGTT         | 5                |                                     | 5                                       |                                    | deletion, small            | Low                             | N                                    |
| c.260_261delGA             | 2                | 2                                   |                                         |                                    | deletion, small            | High                            | N+C                                  |
| c.30delG                   | 4                |                                     | 4                                       |                                    | deletion, small            | High                            | N+C                                  |
| c.35_41delACATCCA          | 4                |                                     | 4                                       |                                    | deletion, small            | High                            | N+C                                  |
| c.356delA                  | 14               | 3                                   | 7                                       | 4                                  | deletion, small            | High                            | N+C                                  |
| c.40delC                   | 4                | 1                                   | 3                                       |                                    | deletion, small            | High                            | N+C                                  |
| c.481_484 delAAAG          | 1                |                                     |                                         | 1                                  | deletion, small            | High                            | N+C                                  |

|                            |    |   |    |    |                  |      |     |
|----------------------------|----|---|----|----|------------------|------|-----|
| c.520_523delTCTG           | 6  | 2 | 4  |    | deletion, small  | High | N+C |
| c.571delG                  | 1  | 1 |    |    | deletion, small  | High | N+C |
| c.62_66delAGGGA            | 1  |   | 1  |    | deletion, small  | High | N+C |
| c.626_629delAACA           | 2  | 2 |    |    | deletion, small  | High | N+C |
| c.639delT                  | 5  |   | 4  | 1  | deletion, small  | High | N+C |
| c.685_688delAGAG           | 15 | 2 | 5  | 8  | deletion, small  | High | N+C |
| c.687_688delAG             | 10 | 3 | 6  | 1  | deletion, small  | High | N+C |
| c.766_767delGT             | 30 |   | 8  | 22 | deletion, small  | High | N+C |
| c.76delA                   | 5  | 3 | 2  |    | deletion, small  | High | N+C |
| c.85delG                   | 2  |   | 2  |    | deletion, small  | High | N+C |
| c.20_24delTCCTGins<br>CCCT | 3  |   | 3  |    | indels, small    | High | N+C |
| c.433_442delinsAGA         | 9  | 1 | 5  | 3  | indels, small    | High | N+C |
| c.668_669delATinsG         | 5  | 2 | 3  |    | indels, small    | High | N+C |
| 41-bp insertion exon 1     | 7  | 2 | 5  |    | insertion, gross | High | N+C |
| c.1124_1125dupTT           | 1  |   |    | 1  | insertion, small | High | C   |
| c.127_128insC              | 1  | 1 |    |    | insertion, small | High | N+C |
| c.14_17dupTTAG             | 2  | 1 | 1  |    | insertion, small | High | N+C |
| c.194dupA                  | 4  |   | 3  | 1  | insertion, small | High | N+C |
| c.205dupC                  | 3  |   | 3  |    | insertion, small | High | N+C |
| c.375dupA                  | 1  | 1 |    |    | insertion, small | High | N+C |
| c.687_688dupAG             | 45 | 8 | 26 | 11 | insertion, small | High | N+C |
| c.692_693insT              | 1  | 1 |    |    | insertion, small | High | N+C |
| c.745dup1                  | 1  |   | 1  |    | insertion, small | High | N+C |
| g.95151T>C                 | 2  |   | 2  |    | intronic         | Low  | -   |
| c.1135G>A                  | 1  |   | 1  |    | missense         | Low  | C   |
| c.163T>A                   | 1  |   | 1  |    | missense         | Low  | N   |
| c.164A>C                   | 12 |   | 9  | 3  | missense         | Low  | N   |
| c.176C>T                   | 1  | 1 |    |    | missense         | Low  | N   |

|            |    |   |   |   |            |      |     |
|------------|----|---|---|---|------------|------|-----|
| c.188T>C   | 9  |   | 6 | 3 | missense   | Low  | N   |
| c.191T>C   | 5  |   | 5 |   | missense   | Low  | N   |
| c.272G>C   | 1  |   | 1 |   | missense   | Low  | N   |
| c.284T>C   | 7  |   | 5 | 2 | missense   | Low  | N   |
| c.293T>C   | 1  |   | 1 |   | missense   | Low  | N   |
| c.815A>G   | 1  |   | 1 |   | missense   | Low  | N   |
| c.1475G>A  | 1  |   | 1 |   | nonsense   | High | C   |
| c.157G>T   | 2  |   | 2 |   | nonsense   | High | N+C |
| c.162C>G   | 2  |   | 2 |   | nonsense   | High | N+C |
| c.165C>A   | 8  | 1 | 6 | 1 | nonsense   | High | N+C |
| c.165C>G   | 7  | 1 | 5 | 1 | nonsense   | High | N+C |
| c.226C>T   | 4  | 3 | 1 |   | nonsense   | High | N+C |
| c.25C>T    | 9  |   | 8 | 1 | nonsense   | High | N+C |
| c.271C>T   | 3  |   | 3 |   | nonsense   | High | N+C |
| c.343G>T   | 1  | 1 |   |   | nonsense   | High | N+C |
| c.376C>T   | 2  | 1 | 1 |   | nonsense   | High | N+C |
| c.406A>T   | 6  |   | 6 |   | nonsense   | High | N+C |
| c.40C>T    | 2  | 1 | 1 |   | nonsense   | High | N+C |
| c.415C>T   | 4  | 3 | 1 |   | nonsense   | High | N+C |
| c.505C>T   | 3  |   | 3 |   | nonsense   | High | N+C |
| c.664C>T   | 15 | 5 | 8 | 2 | nonsense   | High | N+C |
| c.700C>T   | 7  | 3 | 3 | 1 | nonsense   | High | N+C |
| c.85G>T    | 2  |   | 2 |   | nonsense   | High | N+C |
| c.96G>A    | 13 | 2 | 9 | 2 | nonsense   | High | N+C |
| *12C>A     | 1  |   | 1 |   | regulatory | Low  | -   |
| c.-4dupG   | 1  |   | 1 |   | regulatory | Low  | -   |
| c.131+1G>A | 3  |   | 3 |   | splicing   | High | N+C |
| c.237+1G>C | 7  |   | 5 | 2 | splicing   | High | N+C |
| c.238-1G>A | 2  | 2 |   |   | splicing   | High | N+C |

|                                                   |                                    |                                                            |                                                                 |                                                        |          |      |     |
|---------------------------------------------------|------------------------------------|------------------------------------------------------------|-----------------------------------------------------------------|--------------------------------------------------------|----------|------|-----|
| c.306_307+13del                                   | 7                                  | 1                                                          | 6                                                               |                                                        | splicing | High | N+C |
| c.307+1G>A                                        | 2                                  | 1                                                          | 1                                                               |                                                        | splicing | High | N+C |
| c.307+5G>T                                        | 1                                  |                                                            | 1                                                               |                                                        | splicing | High | N+C |
| c.308-9T>A                                        | 1                                  |                                                            | 1                                                               |                                                        | splicing | High | N+C |
| c.423+1G>A                                        | 1                                  | 1                                                          |                                                                 |                                                        | splicing | High | N+C |
| c.424-5T>C                                        | 1                                  |                                                            | 1                                                               |                                                        | splicing | High | N+C |
| <i>Sum of distinct CDC73</i><br>DNA mutations: 86 | Sum of<br>total No.<br>of pts: 419 | Sum of No.<br>of pts w/<br>parathyroid<br>carcinoma:<br>77 | Sum of No.<br>of pts w/<br>benign<br>parathyroid<br>lesion: 252 | Sum of No. of<br>pts w/o<br>parathyroid<br>disease: 90 |          |      |     |
|                                                   |                                    |                                                            |                                                                 |                                                        |          |      |     |

1: Mutation type as assigned by HGMD (Human Genetic Mutation Database) from

<http://www.hgmd.cf.ac.uk/ac/index.php>.

2: Group assigned based on the definition described in the Results section.

3: The effect of the mutations was predicted by Mutalyzer (<https://mutalyzer.nl/>) and Human Splicing Finder 3.0 (<http://www.umd.be/HSF3/index.html>). N, affecting the NTD only; C, affecting the CTD only, N+C, affecting both the NTD and the CTD.
