# Supplementary material
Source: PubMed Central journal article supplement (PMC8802173)
Supplement: NIHMS1767596-supplement-Table_S3.pdf [file NIHMS1767596-supplement-Table_S3.pdf]

Table S3. The percentages of the low-impact and the high-impact mutations in the subjects who developed jaw disease, kidney disease or uterine disease. The ratio of the above mutations in the subjects who developed the specified disease was compared to the ratio in all the subjects. The significance of the difference was calculated using chi-square or Fisher's exact test, as appropriate.

|                        | Percentage of the CDC73 germline mutations |            | Statistical Significance |
|------------------------|--------------------------------------------|------------|--------------------------|
|                        | High-impact                                | Low-impact |                          |
| Jaw disease (N=84)     | 81 (96.4%)                                 | 3 (3.6%)   | P=0.019                  |
| Kidney disease (N=86)  | 79 (91.9%)                                 | 7 (8.1%)   | P=0.409                  |
| Uterine disease (N=54) | 43 (79.6%)                                 | 11 (20.4%) | P=0.127                  |
